# Supplementary material for: Processing of Alu small RNAs by DICER/ADAR1 complexes and their RNAi targets
Source: RNA. 2020 Dec;26(12):1801–14. doi: 10.1261/rna.076745.120 (PMC7668262; doi:10.1261/rna.076745.120)
Supplement: Supplemental Material [file supp_076745.120_Supplemental_TableS1_.xlsx]

## Sheet: DNA RNA oligos
Supplementary Table S1. DNA and RNA Oligos Used in This Study
Cloning Oligos
Plasmid Construction	Protein Purification	Primer Name
	pFastBac-DICER-FLAG	pFastBac-Not1-coz-DICER-F	Forward	CTCTCCTCGCGGCCGCAGAATAAAAATGAAAAGCCCTGCTTTGCAACC
		pFastBac-Xho1-DICER-R-1xFLAG	Reverse	CCTCCTCGAGTTACTTGTCATCGTCATCCTTGTAGTCTCCACCTCCACCTCCACCTCCACCGCTATTGGGAACCTGAGGTTGATTAGC
	In Vitro Transcription
	pBS-ssAlu	AuSx103Fw		GGC CGG GCG CGG TGG CTC
		AluSx103Rv_1	Sense	GTC TCA AAA AAA AAA AAA AAA AAA AGA TTC ATT TCC CCC CCC CCC C
			Comp	GGG GGG GGG GGG AAA TGA ATC TTT TTT TTT TTT TTT TTT TTG AGA C
		AluSx103Rv_2	Sense	GAT TCA TTT CCC CCC CCC CCC
			Comp	GGG GGG GGG GGG AAA TGA ATC
		AluSx103Rv_3	Sense	CTC TGT CTC AAA AAA AAA AAA AAA AAA AAG ATT CAT TTC C
			Comp	GGA AAT GAA TCT TTT TTT TTT TTT TTT TTT TGA GAC AGA G
		AluSx103Rv_4	Sense	CAG AGC GAG ACT CTG TCT CAA AAA
			Comp	TTT TTG AGA CAG AGT CTC GCT CTG
	pBS-NFkB-dsAlu	Bam-NFKBFW2	Forward	CATCCGGATCCTCTCACTCCAAAACTATGGCCA
		Xho-NFKBDW2	Reverse	ATAAGAATCTCGAGGTGGCGGTTTCAGGGTTTTT
	pcDNA3.2-NICN1-dsAlu	NICN1 1stPCR	Forward	AGTCTCTTGGTTTCTGAGCTG
		NICN1 1stPCR	Reverse	CCTCTTAAAAGGCAACAATGAG
		NICN1 2ndPCR	Forward	CACCCATATGCACTCACAAGCTCGACGTACACCACCCATATGCACTCACAAGCTCGACGTACACGGCACGTGTCTCTAGCAAAAC
		NICN1 2ndPCR	Reverse	CAGGTCGACTCCCTCAGAGAAGTAGTCACGGTTGATCTCTCATTATGCTG
		S1 tag PCR	Forward	GCAGGGAGTCGACCGACCAGAATCATGCAAGTGCGTAAGATAGTCGCGGGCCGGGggcgtattatgtgcgtctacatctagactc
		S1 tag PCR	Reverse	CAGATATCGTGTAGTCATCGGACGAGTCTGTATTTATTatgagtctagatgtagacgcacataatacgccCCCGGCCCGCGACTA
Dicing Product Cloning	Adaptor			Upper DNA, Lower RNA
		5' adapter		TGGAATucucgggcaccaaggu
		3' adapter	3Linker3T	5rAppTTTAACCGCGAATTCCAGddC
	RT Primer	3' RT primer		ACGCTGGAATTCGCGGTTAAA
	PCR Primer	1st PCR primer	Forward	GTATGGAATTCTCGGGCACCAA
		1st PCR primer	Reverse	ACGCTGGAATTCGCGGTTAAA
		2nd PCR primer	Forward	CGTACGTAAATGATACGGCGACCACCGAGATCTACACGTATGGAATTCTCGGGCACCAAG
		2nd PCR primer	Reverse	CAACAACGTACGTACAAGCAGAAGACGGCATACGAGATGACGCTGGAATTCGCGGTTAAA
siRNA List
siRNAs for Transfection	RNA Name	Vendors and Cat.#		Sense Strand (5'->3')
	siControl*	QIAGEN, SI03650318	Allstars Negative Control siRNA	-
	Alu siRNA S1	QIAGEN, Custom made	miScript Mimic	AGAUCCCACCGCUGCCACCA
	Alu siRNA S2	QIAGEN, Custom made	miScript Mimic	GAUAGCGAGACCCCGUCUCUA
	Alu siRNA S3	QIAGEN, Custom made	miScript Mimic	ACCAACAUAGCAAGACUCCAUCUU
	Alu siRNA S4	QIAGEN, Custom made	miScript Mimic	AGAUCCCACCACUGCCACCAA
	Alu siRNA AS1	QIAGEN, Custom made	miScript Mimic	GAUCCCCGGCACCUCCACC
	Alu siRNA AS2	QIAGEN, Custom made	miScript Mimic	GUGCACGAUCUCGGCUCACUGCA
	Alu siRNA AS3	QIAGEN, Custom made	miScript Mimic	GUGCACGAUCUCGGCUCACUGCAA
	Alu siRNA AS4	QIAGEN, Custom made	miScript Mimic	GCGCACGAUCUCGGCUCACUGCA
	siControl	Ambion, 4390844	Silencer select siRNA	-
	siCDCP1-1	Ambion, s35060	Silencer select siRNA	-
	siCDCP1-2	Ambion, s35061	Silencer select siRNA	-
	siAGO2-1	Ambion, s25930	Silencer select siRNA	-
	siAGO2-2	Ambion, s25931	Silencer select siRNA	-
