# Supplementary material for: Processing of Alu small RNAs by DICER/ADAR1 complexes and their RNAi targets
Source: RNA. 2020 Dec;26(12):1801–14. doi: 10.1261/rna.076745.120 (PMC7668262; doi:10.1261/rna.076745.120)
Supplement: Supplemental Material [file supp_076745.120_Supplemental_TableS2_.xlsx]

## Sheet: Antibodies
Supplementary Table S2. Antibodies Supplementary Used in This Study
Antibody List
	Target Gene	Cat.#	Vendors	Immunized
Immunoblotting	CDCP1	4115	Cell Signaling Technology	Rabbit
	ACTB	8457	Cell Signaling Technology	Rabbit
	AGO2	2897	Cell Signaling Technology	Rabbit
	Cleaved PARP	5625	Cell Signaling Technology	Rabbit
