# Supplementary material for: Processing of Alu small RNAs by DICER/ADAR1 complexes and their RNAi targets
Source: RNA. 2020 Dec;26(12):1801–14. doi: 10.1261/rna.076745.120 (PMC7668262; doi:10.1261/rna.076745.120)
Supplement: Supplemental Material [file supp_076745.120_Supplemental_TableS3_.xlsx]

## Sheet: Sheet1
	Supplementary Table S3. AGO2 Bound Alu endo-siRNAs
	AGO2 Bound Sense Alu					AGO2 Bound Antisense Alu
	AGO2-Genomic Alu-S					AGO2-Genomic Alu-AS
1	6436	Sense S1 (20 nt）			1	4762	Sense AS1 (19nt)		Read counts and siRNA name
	AGATCCCACCGCTGCCACCA					GATCCCCGGCACCTCCACC			Sequence
2	1102				2	2899
	AGATCCCACCGCTGCCACC					GATCTCGGTGGAACCTCCA
3	513	Sense S2 (21 nt)			3	2360
	GATAGCGAGACCCCGTCTCTA					AATCTCGGTGGAACCTCCA
4	308				4	1735
	AGATCCCACCACTNCCACCA					CATCTCGGTGGAACCTCCA
5	303	Sense S3 (24 nt)			5	1630
	ACCAACATAGCAAGACTCCATCTT					GGTCTCGCTGGGGCCTCCA
6	248				6	1407
	AGAAAGACACCCCCCACCA					CGTCTCGGTGGAACCTCCA
7	244	Sense S3 (21 nt)			7	986
	AGATCCCACCACTGCCACCAA					TGTCTCGGTGGAACCTCCA
8	223				8	787	Sense AS2 (23 nt)
	AACAACATAGCAAGACTCCATCTT					GTGCACGATCTCGGCTCACTGCA
9	210				9	438	Sense AS3 (24 nt)
	GATAGCGAGACCCCGTCTCTTA					GTGCACGATCTCGGCTCACTGCAA
10	190				10	435	Sense AS4 (23 nt)
	GACCAGGCATGATGGTTCACGCCT					GCGCGCGATCTCGGCTCACTGCA
11	169				11	431
	GATAGCGAGACCCCGTCTCTT					GCGCACGATCTCGGCTCACTGCA
12	165				12	407
	AGCAACATAGCAAGACTCCATCTT					GAGCACGATCTCGGCTCACTGCA
13	149				13	313
	GCTAGCGAGACCCCGTCTCTA					GTGCACGATCTCGGCTCACTGC
14	125				14	285
	GGTAGCGAGACCCCGTCTCTA					GAGCGCGATCTCGGCTCACTGCA
15	121				15	280
	TCCAACATAGCAAGACTCCATCTT					GTGCGCGATCTCGGCTCACTGCA
16	118				16	266
	CGTAGCGAGACCCCGTCTCTA					TTTGTTTAGACGGGCTCAC
17	115				17	233
	GATAGCGAGACCCNGTCTCTA					GAGCACGATCTCGGCTCACTGCAA
18	113				18	220
	GCCAACATAGCAAGACTCCATCTT					GCGCACGATCTCGGCTCACTGCAA
19	109				19	216
	ACCCAGGCATGATGGTTCACGCCT					GGGCACGATCTCGGCTCACTGCAA
20	107				20	176
	ACTAGCGAGACCCCGTCTCTA					GCGCACGATCTCGGCTCACTGC
21	103				21	176
	CCCGGGGGGCGGGGCGGAC					GCGCGCGATCTCGGCTCACTGCAA
22	86				22	173
	GACAACATAGCAAGACTCCATCTT					AGTAGCCGTAAGGCGCCTG
23	84				23	171
	TCTATACTACAAGGACAGA					CAATCTCGGTGGAACCTCCA
24	83				24	169
	AATAGCGAGACCCCGTCTCTA					GCTCCCCAGTACCTCCACC
25	79				25	158
	AACCAGGCATGATGGTTCACGCCT					GTGCACGATCTCGNCTCACTGCA
26	73				26	152
	AGCCAGGCATGATGGTTCACGCCT					GAGCACGATCTCGGCTCACTGC
27	70				27	144
	GAATAGCGAGACCCCGTCTCTT					GATCCCCAGTACCTCCACC
28	68				28	139
	TGCAACATAGCAAGACTCCATCTT					GGCGCCGCCGCCCCCCCCAC
29	65				29	121
	GATAGCGAGACCCCGTCTCT					TGTCCTCACCTGGAGCACCA
30	65				30	112
	GGAACCCGAGAGGTGGAAGTTGCAGT					GAGGAGCCATTGTGGCTCA
31	65				31	101
	GGACTGCACTCCAGCCTGCTGGG					GAGCGCGATCTCGGCTCACTGCAA
32	64				32	99
	AGATCCCACCGCTGCCACCAG					CAATCCTGCCGACTACGCC
33	64				33	97
	GTTAGCGAGACCCCGTCTCTA					GCGCGCGATCTCGNCTCACTGCA
34	63				34	96
	GGCAACATAGCAAGACTCCATCTT					GTCCTCACCTGGAGCACCA
35	58				35	95
	GAGATCCCACCGCTGCCACCA					TATGTTGTACTTTTTTTTTTTTTC
36	58				36	94
	TAAACGCAGCTAGCTGCGAGA					GTGCACGATCTCGNCTCACTGCAA
37	56				37	93
	GCTAGCGAGACCCCGTCTCTTA					TGAAAGACACCCCCCACCA
38	55				38	91
	AGCAACATAGCAAGACTCCATCTTT					GTGCGCGATCTCGGCTCACTGCAA
39	53				39	86
	CACAACATAGCAAGACTCCATCTT					GCGCACGATCTCGNCTCACTGCA
40	51				40	85
	ATCCAGGCATGATGGTTCACGCCT					GATCCCCGGCACCTCCACCT
41	50				41	80
	GGCCAGGCATGATGGTTCACGCCT					GGCCTCACCTGGAGCACCA
42	50				42	76
	ACTGCAGTGAGCCGAGATTGCA					AACCTCACCTGGAGCACCA
43	49				43	72
	TACAACATAGCAAGACTCCATCTT					GAGCACGATCTCGNCTCACTGCA
44	49				44	71
	TTTAGCGAGACCCCGTCTCTA					GGGCACGATCTCGNCTCACTGCA
45	48				45	67
	ACTAGCGAGACCCCGTCTCTTA					CCCAAAGTGCTTACAGTGCAGGCA
46	47				46	67
	AGATCCCACCNCTGCCACCA					CATGTTGTACTTTTTTTTTTTTTC
47	47				47	67
	ATTAGCGAGACCCCGTCTCTA					GATTAGAGGCACCGCCTGCCA
48	47				48	67
	GGTAGCGAGACCCCGTCTCTTA					GGGCGCGATCTCGGCTCACTGCAA
49	45				49	66
	TTCAACATAGCAAGACTCCATCTT					GACCTCACCTGGAGCACCA
50	45				50	65
	CCTAGCGAGACCCCGTCTCTA					GAGCGCGATCTCGNCTCACTGCA
