# Supplementary material for: Processing of Alu small RNAs by DICER/ADAR1 complexes and their RNAi targets
Source: RNA. 2020 Dec;26(12):1801–14. doi: 10.1261/rna.076745.120 (PMC7668262; doi:10.1261/rna.076745.120)
Supplement: Supplemental Material [file supp_076745.120_Supplemental_TableS4_.xlsx]

## Sheet: (A) Antisense
Supplementary Table S4. Genes Containing a Single Alu Sequence within Their 3'UTRs
(A) Genes Containing Antisense Alu Sequence within Their 3'UTRs
Gene ID	Mapped IDs	Gene Name	PANTHER Family/Subfamily	PANTHER Protein Class	Articles related to apoptosis
HUMAN|HGNC=25250|UniProtKB=Q9BRR6	ADPGK	ADP-dependent glucokinase	ADP-DEPENDENT GLUCOKINASE (PTHR21208:SF0)	kinase	YES	≧2
HUMAN|HGNC=362|UniProtKB=P54819	AK2	Adenylate kinase 2, mitochondrial	ADENYLATE KINASE 2, MITOCHONDRIAL (PTHR23359:SF22)	nucleotide kinase	YES	≧2
HUMAN|HGNC=28114|UniProtKB=Q8IZ83	ALDH16A1	Aldehyde dehydrogenase family 16 member A1	ALDEHYDE DEHYDROGENASE FAMILY 16 MEMBER A1 (PTHR11699:SF211)	dehydrogenase
HUMAN|HGNC=407|UniProtKB=P30837	ALDH1B1	Aldehyde dehydrogenase X, mitochondrial	ALDEHYDE DEHYDROGENASE X, MITOCHONDRIAL (PTHR11699:SF207)	dehydrogenase	YES	≧2
HUMAN|HGNC=26777|UniProtKB=Q3SY69	ALDH1L2	Mitochondrial 10-formyltetrahydrofolate dehydrogenase	MITOCHONDRIAL 10-FORMYLTETRAHYDROFOLATE DEHYDROGENASE (PTHR11699:SF131)	dehydrogenase	YES	≧2
HUMAN|HGNC=649|UniProtKB=P48444	ARCN1	Coatomer subunit delta	COATOMER SUBUNIT DELTA (PTHR10121:SF0)	vesicle coat protein
HUMAN|HGNC=673|UniProtKB=Q07960	ARHGAP1	Rho GTPase-activating protein 1	RHO GTPASE-ACTIVATING PROTEIN 1 (PTHR45808:SF6)	-	YES	≧2
HUMAN|HGNC=851|UniProtKB=P38606	ATP6V1A	V-type proton ATPase catalytic subunit A	V-TYPE PROTON ATPASE CATALYTIC SUBUNIT A (PTHR43607:SF1)	ATP synthase	YES	1
HUMAN|HGNC=856|UniProtKB=P21283	ATP6V1C1	V-type proton ATPase subunit C 1	V-TYPE PROTON ATPASE SUBUNIT C 1 (PTHR10137:SF5)	ATP synthase
HUMAN|HGNC=18803|UniProtKB=Q5TC12	ATPAF1	ATP synthase mitochondrial F1 complex assembly factor 1	ATP SYNTHASE MITOCHONDRIAL F1 COMPLEX ASSEMBLY FACTOR 1 (PTHR13126:SF0)	chaperone	YES	1
HUMAN|HGNC=30547|UniProtKB=Q96K17	BTF3L4	Transcription factor BTF3 homolog 4	TRANSCRIPTION FACTOR BTF3 HOMOLOG 4 (PTHR10351:SF29)	-
HUMAN|HGNC=24758|UniProtKB=Q5BKX5	C19orf54	UPF0692 protein C19orf54	UPF0692 PROTEIN C19ORF54 (PTHR28631:SF1)	-
HUMAN|HGNC=17150|UniProtKB=Q9Y2V2	CARHSP1	Calcium-regulated heat-stable protein 1	CALCIUM-REGULATED HEAT-STABLE PROTEIN 1 (PTHR12962:SF3)	RNA binding protein
HUMAN|HGNC=1539|UniProtKB=Q13951	CBFB	Core-binding factor subunit beta	CORE-BINDING FACTOR SUBUNIT BETA (PTHR10276:SF3)	DNA-binding transcription factor	YES	≧2
HUMAN|HGNC=1594|UniProtKB=P51946	CCNH	Cyclin-H	CYCLIN-H (PTHR10026:SF8)	kinase activator	YES	≧2
HUMAN|HGNC=24357|UniProtKB=Q9H5V8	CDCP1	CUB domain-containing protein 1	CUB DOMAIN-CONTAINING PROTEIN 1 (PTHR14477:SF1)	-	YES	≧2
HUMAN|HGNC=24287|UniProtKB=Q7LBR1	CHMP1B	Charged multivesicular body protein 1b	CHARGED MULTIVESICULAR BODY PROTEIN 1B (PTHR10476:SF18)	membrane traffic protein	YES	≧2
HUMAN|HGNC=13544|UniProtKB=Q9NRG0	CHRAC1	Chromatin accessibility complex protein 1	CHROMATIN ACCESSIBILITY COMPLEX PROTEIN 1 (PTHR10252:SF54)	DNA binding protein	YES	1
HUMAN|HGNC=1960|UniProtKB=P36544	CHRNA7	Neuronal acetylcholine receptor subunit alpha-7	CHRNA7-FAM7A FUSION PROTEIN-RELATED (PTHR18945:SF832)	ligand-gated ion channel	YES	≧2
HUMAN|HGNC=29094|UniProtKB=O75153	CLUH	Clustered mitochondria protein homolog	CLUSTERED MITOCHONDRIA PROTEIN HOMOLOG (PTHR12601:SF6)	translation initiation factor
HUMAN|HGNC=2156|UniProtKB=Q99439	CNN2	Calponin-2	CALPONIN-2 (PTHR18959:SF47)	non-motor actin binding protein	YES	≧2
HUMAN|HGNC=2158|UniProtKB=P09543	CNP	2',3'-cyclic-nucleotide 3'-phosphodiesterase	2',3'-CYCLIC-NUCLEOTIDE 3'-PHOSPHODIESTERASE (PTHR10156:SF0)	phosphodiesterase	YES	≧2
HUMAN|HGNC=26182|UniProtKB=Q8NBJ5	COLGALT1	Procollagen galactosyltransferase 1	PROCOLLAGEN GALACTOSYLTRANSFERASE 1 (PTHR10730:SF28)	oxygenase
HUMAN|HGNC=2323|UniProtKB=P31327	CPS1	Carbamoyl-phosphate synthase [ammonia], mitochondrial	CARBAMOYL-PHOSPHATE SYNTHASE [AMMONIA], MITOCHONDRIAL (PTHR11405:SF38)	ligase	YES	≧2
HUMAN|HGNC=2363|UniProtKB=P46109	CRKL	Crk-like protein	CRK-LIKE PROTEIN (PTHR19969:SF20)	-	YES	≧2
HUMAN|HGNC=2379|UniProtKB=O75718	CRTAP	Cartilage-associated protein	CARTILAGE-ASSOCIATED PROTEIN (PTHR13986:SF3)	protein modifying enzyme
HUMAN|HGNC=2552|UniProtKB=Q13617	CUL2	Cullin-2	CULLIN-2 (PTHR11932:SF131)	ubiquitin-protein ligase	YES	≧2
HUMAN|HGNC=2649|UniProtKB=Q16850	CYP51A1	Lanosterol 14-alpha demethylase	LANOSTEROL 14-ALPHA DEMETHYLASE (PTHR24286:SF191)	oxygenase	YES	≧2
HUMAN|HGNC=15594|UniProtKB=Q9UK59	DBR1	Lariat debranching enzyme	LARIAT DEBRANCHING ENZYME (PTHR12849:SF0)	endoribonuclease
HUMAN|HGNC=28409|UniProtKB=Q9BTE7	DCUN1D5	DCN1-like protein 5	DCN1-LIKE PROTEIN 5 (PTHR12281:SF6)	-	YES	1
HUMAN|HGNC=9439|UniProtKB=Q13217	DNAJC3	DnaJ homolog subfamily C member 3	DNAJ HOMOLOG SUBFAMILY C MEMBER 3 (PTHR44140:SF3)	-	YES	≧2
HUMAN|HGNC=3037|UniProtKB=Q14574	DSC3	Desmocollin-3	DESMOCOLLIN-3 (PTHR24025:SF12)	cadherin	YES	≧2
HUMAN|HGNC=3036|UniProtKB=Q02487	DSC2	Desmocollin-2	DESMOCOLLIN-2 (PTHR24025:SF0)	cadherin	YES	≧2
HUMAN|HGNC=3243|UniProtKB=Q9NZN4	EHD2	EH domain-containing protein 2	EH DOMAIN-CONTAINING PROTEIN 2 (PTHR11216:SF62)	membrane traffic protein	YES	≧2
HUMAN|HGNC=14129|UniProtKB=Q96KQ7	EHMT2	Histone-lysine N-methyltransferase EHMT2	HISTONE-LYSINE N-METHYLTRANSFERASE EHMT2 (PTHR46307:SF1)	-	YES	≧2
HUMAN|HGNC=9437|UniProtKB=P19525	EIF2AK2	Interferon-induced, double-stranded RNA-activated protein kinase	INTERFERON-INDUCED, DOUBLE-STRANDED RNA-ACTIVATED PROTEIN KINASE (PTHR11042:SF163)	non-receptor serine/threonine protein kinase	YES	≧2
HUMAN|HGNC=20696|UniProtKB=Q9H9T3	ELP3	Elongator complex protein 3	ELONGATOR COMPLEX PROTEIN 3 (PTHR11135:SF0)	histone modifying enzyme	YES	1
HUMAN|HGNC=28032|UniProtKB=Q5J8M3	EMC4	ER membrane protein complex subunit 4	ER MEMBRANE PROTEIN COMPLEX SUBUNIT 4 (PTHR19315:SF9)	-	YES	1
HUMAN|HGNC=25087|UniProtKB=Q8IWE2	FAM114A1	Protein NOXP20	PROTEIN NOXP20 (PTHR12842:SF4)	-
HUMAN|HGNC=13586|UniProtKB=Q9Y3I1	FBXO7	F-box only protein 7	F-BOX ONLY PROTEIN 7 (PTHR15537:SF2)	-	YES	≧2
HUMAN|HGNC=3638|UniProtKB=P10109	FDX1	Adrenodoxin, mitochondrial	ADRENODOXIN, MITOCHONDRIAL (PTHR23426:SF26)	-	YES	≧2
HUMAN|HGNC=3659|UniProtKB=Q99689	FEZ1	Fasciculation and elongation protein zeta-1	FASCICULATION AND ELONGATION PROTEIN ZETA-1 (PTHR12394:SF4)	-	YES	≧2
HUMAN|HGNC=3725|UniProtKB=O95302	FKBP9	Peptidyl-prolyl cis-trans isomerase FKBP9	PEPTIDYL-PROLYL CIS-TRANS ISOMERASE FKBP9 (PTHR46046:SF2)	-
HUMAN|HGNC=3712|UniProtKB=P68106	FKBP1B	Peptidyl-prolyl cis-trans isomerase FKBP1B	PEPTIDYL-PROLYL CIS-TRANS ISOMERASE FKBP1B (PTHR10516:SF429)	chaperone	YES	≧2
HUMAN|HGNC=17069|UniProtKB=Q96RU3	FNBP1	Formin-binding protein 1	FORMIN-BINDING PROTEIN 1 (PTHR15735:SF13)	-	YES	1
HUMAN|HGNC=24678|UniProtKB=Q9C0B1	FTO	Alpha-ketoglutarate-dependent dioxygenase FTO	ALPHA-KETOGLUTARATE-DEPENDENT DIOXYGENASE FTO (PTHR31291:SF2)	-	YES	≧2
HUMAN|HGNC=4163|UniProtKB=P22102	GART	Trifunctional purine biosynthetic protein adenosine-3	TRIFUNCTIONAL PURINE BIOSYNTHETIC PROTEIN ADENOSINE-3 (PTHR10520:SF12)	ligase	YES	≧2
HUMAN|HGNC=4387|UniProtKB=P08754	GNAI3	Guanine nucleotide-binding protein G(k) subunit alpha	GUANINE NUCLEOTIDE-BINDING PROTEIN G(K) SUBUNIT ALPHA (PTHR10218:SF230)	heterotrimeric G-protein	YES	≧2
HUMAN|HGNC=4621|UniProtKB=P15170	GSPT1	Eukaryotic peptide chain release factor GTP-binding subunit ERF3A	EUKARYOTIC PEPTIDE CHAIN RELEASE FACTOR GTP-BINDING SUBUNIT ERF3A (PTHR23115:SF125)	translation factor	YES	≧2
HUMAN|HGNC=5004|UniProtKB=O15347	HMGB3	High mobility group protein B3	HIGH MOBILITY GROUP PROTEIN B3 (PTHR48112:SF14)	-	YES	≧2
HUMAN|HGNC=5344|UniProtKB=P05362	ICAM1	Intercellular adhesion molecule 1	INTERCELLULAR ADHESION MOLECULE 1 (PTHR13771:SF9)	-	YES	≧2
HUMAN|HGNC=6152|UniProtKB=P20702	ITGAX	Integrin alpha-X	INTEGRIN ALPHA-X (PTHR23220:SF118)	-	YES	≧2
HUMAN|HGNC=16951|UniProtKB=Q9Y6Y0	IVNS1ABP	Influenza virus NS1A-binding protein	INFLUENZA VIRUS NS1A-BINDING PROTEIN (PTHR24412:SF396)	scaffold/adaptor protein	YES	1
HUMAN|HGNC=26756|UniProtKB=Q6UWP7	LCLAT1	Lysocardiolipin acyltransferase 1	LYSOCARDIOLIPIN ACYLTRANSFERASE 1 (PTHR10983:SF59)	-	YES	≧2
HUMAN|HGNC=6628|UniProtKB=Q15334	LLGL1	Lethal(2) giant larvae protein homolog 1	LETHAL(2) GIANT LARVAE PROTEIN HOMOLOG 1 (PTHR10241:SF21)	membrane trafficking regulatory protein	YES	≧2
HUMAN|HGNC=26032|UniProtKB=Q7L5N7	LPCAT2	Lysophosphatidylcholine acyltransferase 2	LYSOPHOSPHATIDYLCHOLINE ACYLTRANSFERASE 2 (PTHR23063:SF21)	acyltransferase	YES	1
HUMAN|HGNC=30244|UniProtKB=Q6P1A2	LPCAT3	Lysophosphatidylcholine acyltransferase 3	Lysophosphatidylcholine acyltransferase 3	acetyltransferase	YES	1
HUMAN|HGNC=15714|UniProtKB=P42704	LRPPRC	Leucine-rich PPR motif-containing protein, mitochondrial	LEUCINE-RICH PPR MOTIF-CONTAINING PROTEIN, MITOCHONDRIAL (PTHR46669:SF1)	-	YES	≧2
HUMAN|HGNC=6874|UniProtKB=P53778	MAPK12	Mitogen-activated protein kinase 12	MITOGEN-ACTIVATED PROTEIN KINASE 12 (PTHR24055:SF146)	non-receptor serine/threonine protein kinase	YES	≧2
HUMAN|HGNC=6912|UniProtKB=P43243	MATR3	Matrin-3	MATRIN-3 (PTHR15592:SF2)	-	YES	≧2
HUMAN|HGNC=7103|UniProtKB=P30301	MIP	Lens fiber major intrinsic protein	LENS FIBER MAJOR INTRINSIC PROTEIN (PTHR19139:SF39)	transporter	YES	≧2
HUMAN|HGNC=15765|UniProtKB=O95396	MOCS3	Adenylyltransferase and sulfurtransferase MOCS3	ADENYLYLTRANSFERASE AND SULFURTRANSFERASE MOCS3 (PTHR10953:SF102)	ubiquitin-protein ligase	YES	1
HUMAN|HGNC=26542|UniProtKB=Q5T2T1	MPP7	MAGUK p55 subfamily member 7	MAGUK P55 SUBFAMILY MEMBER 7 (PTHR23122:SF39)	nucleotide kinase
HUMAN|HGNC=16650|UniProtKB=Q9H9J2	MRPL44	39S ribosomal protein L44, mitochondrial	39S RIBOSOMAL PROTEIN L44, MITOCHONDRIAL (PTHR11207:SF5)	endoribonuclease
HUMAN|HGNC=1176|UniProtKB=Q13405	MRPL49	39S ribosomal protein L49, mitochondrial	39S RIBOSOMAL PROTEIN L49, MITOCHONDRIAL (PTHR13477:SF0)	ribosomal protein
HUMAN|HGNC=14512|UniProtKB=Q92552	MRPS27	28S ribosomal protein S27, mitochondrial	28S RIBOSOMAL PROTEIN S27, MITOCHONDRIAL (PTHR21393:SF0)	ribosomal protein	YES	1
HUMAN|HGNC=7428|UniProtKB=Q14872	MTF1	Metal regulatory transcription factor 1	METAL REGULATORY TRANSCRIPTION FACTOR 1 (PTHR19818:SF131)	C2H2 zinc finger transcription factor	YES	≧2
HUMAN|HGNC=7622|UniProtKB=Q01538	MTF1	Myelin transcription factor 1	MYELIN TRANSCRIPTION FACTOR 1 (PTHR10816:SF10)	zinc finger transcription factor	YES	≧2
HUMAN|HGNC=21661|UniProtKB=Q5SSG8	MUC21	Mucin-21	MUCIN-21 (PTHR39408:SF3)	-
HUMAN|HGNC=17940|UniProtKB=Q9P2K5	MYEF2	Myelin expression factor 2	MYELIN EXPRESSION FACTOR 2 (PTHR23003:SF15)	RNA splicing factor
HUMAN|HGNC=29533|UniProtKB=Q9GZZ1	NAA50	N-alpha-acetyltransferase 50	N-ALPHA-ACETYLTRANSFERASE 50 (PTHR42919:SF8)	acetyltransferase	YES	1
HUMAN|HGNC=14462|UniProtKB=Q9UGV2	NDRG3	Protein NDRG3	PROTEIN NDRG3 (PTHR11034:SF20)	serine protease	YES	≧2
HUMAN|HGNC=7684|UniProtKB=O95299	NDUFA10	NADH dehydrogenase [ubiquinone] 1 alpha subcomplex subunit 10, mitochondrial	NADH DEHYDROGENASE [UBIQUINONE] 1 ALPHA SUBCOMPLEX SUBUNIT 10, MITOCHONDRIAL (PTHR10513:SF15)	nucleotide kinase	YES	≧2
HUMAN|HGNC=7687|UniProtKB=O00483	NDUFA4	Cytochrome c oxidase subunit NDUFA4	CYTOCHROME C OXIDASE SUBUNIT NDUFA4 (PTHR14256:SF4)	oxidoreductase	YES	≧2
HUMAN|HGNC=7710|UniProtKB=O75489	NDUFS3	NADH dehydrogenase [ubiquinone] iron-sulfur protein 3, mitochondrial	NADH DEHYDROGENASE [UBIQUINONE] IRON-SULFUR PROTEIN 3, MITOCHONDRIAL (PTHR10884:SF14)	-	YES	≧2
HUMAN|HGNC=24731|UniProtKB=Q8NBF2	NHLRC2	NHL repeat-containing protein 2	NHL REPEAT-CONTAINING PROTEIN 2 (PTHR46388:SF2)	-	YES	1
HUMAN|HGNC=29878|UniProtKB=Q9NQR4	NIT2	Omega-amidase NIT2	OMEGA-AMIDASE NIT2 (PTHR23088:SF30)	hydrolase	YES	≧2
HUMAN|HGNC=2874|UniProtKB=P15559	NQO1	NAD(P)H dehydrogenase [quinone] 1	NAD(P)H DEHYDROGENASE [QUINONE] 1 (PTHR10204:SF1)	-	YES	≧2
HUMAN|HGNC=17634|UniProtKB=Q7Z417	NUFIP2	Nuclear fragile X mental retardation-interacting protein 2	NUCLEAR FRAGILE X MENTAL RETARDATION-INTERACTING PROTEIN 2 (PTHR28333:SF2)	-
HUMAN|HGNC=8591|UniProtKB=Q13177	PAK2	Serine/threonine-protein kinase PAK 2	SERINE/THREONINE-PROTEIN KINASE PAK 2 (PTHR48015:SF22)	-	YES	≧2
HUMAN|HGNC=8729|UniProtKB=P12004	PCNA	Proliferating cell nuclear antigen	PROLIFERATING CELL NUCLEAR ANTIGEN (PTHR11352:SF5)	DNA polymerase processivity factor	YES	≧2
HUMAN|HGNC=25386|UniProtKB=Q6L8Q7	PDE12	2',5'-phosphodiesterase 12	2',5'-PHOSPHODIESTERASE 12 (PTHR12121:SF37)	mRNA polyadenylation factor	YES	1
HUMAN|HGNC=8806|UniProtKB=P08559	PDHA1	Pyruvate dehydrogenase E1 component subunit alpha, somatic form, mitochondrial	PYRUVATE DEHYDROGENASE E1 COMPONENT SUBUNIT ALPHA, SOMATIC FORM, MITOCHONDRIAL (PTHR11516:SF52)	-	YES	≧2
HUMAN|HGNC=8809|UniProtKB=Q15118	PDK1	[Pyruvate dehydrogenase (acetyl-transferring)] kinase isozyme 1, mitochondrial	[PYRUVATE DEHYDROGENASE (ACETYL-TRANSFERRING)] KINASE ISOZYME 1, MITOCHONDRIAL (PTHR11947:SF14)	non-receptor serine/threonine protein kinase	YES	≧2
HUMAN|HGNC=8863|UniProtKB=O15067	PFAS	Phosphoribosylformylglycinamidine synthase	PHOSPHORIBOSYLFORMYLGLYCINAMIDINE SYNTHASE (PTHR10099:SF1)	-	YES	≧2
HUMAN|HGNC=29573|UniProtKB=Q86SQ0	PHLDB2	Pleckstrin homology-like domain family B member 2	PLECKSTRIN HOMOLOGY-LIKE DOMAIN FAMILY B MEMBER 2 (PTHR12156:SF21)	-	YES	1
HUMAN|HGNC=32790|UniProtKB=Q9NRX1	PNO1	RNA-binding protein PNO1	RNA-BINDING PROTEIN PNO1 (PTHR12826:SF13)	-	YES	≧2
HUMAN|HGNC=13546|UniProtKB=Q9NRF9	POLE3	DNA polymerase epsilon subunit 3	DNA POLYMERASE EPSILON SUBUNIT 3 (PTHR46172:SF1)	-	YES	1
HUMAN|HGNC=9191|UniProtKB=O15514	POLR2D	DNA-directed RNA polymerase II subunit RPB4	DNA-DIRECTED RNA POLYMERASE II SUBUNIT RPB4 (PTHR21297:SF0)	DNA-directed RNA polymerase
HUMAN|HGNC=9257|UniProtKB=Q08752	PPID	Peptidyl-prolyl cis-trans isomerase D	PEPTIDYL-PROLYL CIS-TRANS ISOMERASE D-RELATED (PTHR11071:SF380)	-	YES	≧2
HUMAN|HGNC=9370|UniProtKB=P49643	PRIM2	DNA primase large subunit	DNA PRIMASE LARGE SUBUNIT (PTHR10537:SF3)	primase
HUMAN|HGNC=9376|UniProtKB=Q13131	PRKAA1	5'-AMP-activated protein kinase catalytic subunit alpha-1	5'-AMP-ACTIVATED PROTEIN KINASE CATALYTIC SUBUNIT ALPHA-1 (PTHR24343:SF306)	non-receptor serine/threonine protein kinase	YES	≧2
HUMAN|HGNC=9534|UniProtKB=P28066	PSMA5	Proteasome subunit alpha type-5	PROTEASOME SUBUNIT ALPHA TYPE-5 (PTHR11599:SF14)	-	YES	≧2
HUMAN|HGNC=9567|UniProtKB=O00233	PSMD9	26S proteasome non-ATPase regulatory subunit 9	26S PROTEASOME NON-ATPASE REGULATORY SUBUNIT 9 (PTHR12651:SF1)	protease	YES	1
HUMAN|HGNC=9577|UniProtKB=P78330	PSPH	Phosphoserine phosphatase	PHOSPHOSERINE PHOSPHATASE-RELATED (PTHR43344:SF8)	phosphatase	YES	≧2
HUMAN|HGNC=9762|UniProtKB=P51153	RAB13	Ras-related protein Rab-13	RAS-RELATED PROTEIN RAB-13 (PTHR47980:SF42)	-	YES	≧2
HUMAN|HGNC=18263|UniProtKB=Q9UL25	RAB21	Ras-related protein Rab-21	RAS-RELATED PROTEIN RAB-21 (PTHR24073:SF509)	-	YES	1
HUMAN|HGNC=24703|UniProtKB=Q3YEC7	RABL6	Rab-like protein 6	RAB-LIKE PROTEIN 6 (PTHR14932:SF1)	small GTPase	YES	≧2
HUMAN|HGNC=14436|UniProtKB=Q70E73	RAPH1	Ras-associated and pleckstrin homology domains-containing protein 1	RAS-ASSOCIATED AND PLECKSTRIN HOMOLOGY DOMAINS-CONTAINING PROTEIN 1 (PTHR11243:SF15)	scaffold/adaptor protein
HUMAN|HGNC=23711|UniProtKB=Q6NUK4	REEP3	Receptor expression-enhancing protein 3	RECEPTOR EXPRESSION-ENHANCING PROTEIN 3 (PTHR12300:SF39)	membrane traffic protein
HUMAN|HGNC=10019|UniProtKB=Q13546	RIPK1	Receptor-interacting serine/threonine-protein kinase 1	RECEPTOR-INTERACTING SERINE/THREONINE-PROTEIN KINASE 1 (PTHR44329:SF6)	-	YES	≧2
HUMAN|HGNC=10023|UniProtKB=Q92963	RIT1	GTP-binding protein Rit1	GTP-BINDING PROTEIN RIT1 (PTHR24070:SF208)	small GTPase	YES	≧2
HUMAN|HGNC=13222|UniProtKB=Q9C0K0	RIT1	B-cell lymphoma/leukemia 11B	B-CELL LYMPHOMA/LEUKEMIA 11B (PTHR45993:SF4)	C2H2 zinc finger transcription factor	YES	≧2
HUMAN|HGNC=24285|UniProtKB=Q96DB5	RMDN1	Regulator of microtubule dynamics protein 1	REGULATOR OF MICROTUBULE DYNAMICS PROTEIN 1 (PTHR16056:SF16)	-
HUMAN|HGNC=10336|UniProtKB=P62910	RPL32	60S ribosomal protein L32	60S RIBOSOMAL PROTEIN L32 (PTHR23413:SF3)	ribosomal protein	YES	≧2
HUMAN|HGNC=10369|UniProtKB=P32969	RPL9	60S ribosomal protein L9	60S RIBOSOMAL PROTEIN L9 (PTHR11655:SF26)	ribosomal protein	YES	≧2
HUMAN|HGNC=10411|UniProtKB=P62847	RPS24	40S ribosomal protein S24	40S RIBOSOMAL PROTEIN S24 (PTHR10496:SF7)	ribosomal protein	YES	≧2
HUMAN|HGNC=18476|UniProtKB=Q71UM5	RPS27L	40S ribosomal protein S27-like	40S RIBOSOMAL PROTEIN S27-LIKE (PTHR11594:SF2)	ribosomal protein	YES	≧2
HUMAN|HGNC=10419|UniProtKB=P62273	RPS29	40S ribosomal protein S29	40S RIBOSOMAL PROTEIN S29 (PTHR12010:SF2)	-	YES	≧2
HUMAN|HGNC=10452|UniProtKB=P31350	RRM2	Ribonucleoside-diphosphate reductase subunit M2	RIBONUCLEOSIDE-DIPHOSPHATE REDUCTASE SUBUNIT M2 (PTHR23409:SF20)	reductase	YES	≧2
HUMAN|HGNC=18647|UniProtKB=Q8WWV3	RTN4IP1	Reticulon-4-interacting protein 1, mitochondrial	RETICULON-4-INTERACTING PROTEIN 1, MITOCHONDRIAL (PTHR11695:SF294)	dehydrogenase	YES	1
HUMAN|HGNC=1665|UniProtKB=Q14108	SCARB2	Lysosome membrane protein 2	LYSOSOME MEMBRANE PROTEIN 2 (PTHR11923:SF92)	membrane trafficking regulatory protein
HUMAN|HGNC=11846|UniProtKB=Q99442	SEC62	Translocation protein SEC62	TRANSLOCATION PROTEIN SEC62 (PTHR12443:SF9)	-	YES	≧2
HUMAN|HGNC=21082|UniProtKB=Q9UGP8	SEC63	Translocation protein SEC63 homolog	TRANSLOCATION PROTEIN SEC63 HOMOLOG (PTHR24075:SF0)	scaffold/adaptor protein	YES	≧2
HUMAN|HGNC=29446|UniProtKB=Q9H4I8	SERHL2	Serine hydrolase-like protein 2	SERINE HYDROLASE-LIKE PROTEIN-RELATED (PTHR43329:SF72)	hydrolase
HUMAN|HGNC=3311|UniProtKB=P30740	SERPINB1	Leukocyte elastase inhibitor	LEUKOCYTE ELASTASE INHIBITOR (PTHR11461:SF180)	protease inhibitor	YES	≧2
HUMAN|HGNC=16087|UniProtKB=Q9BWM7	SFXN3	Sideroflexin-3	SIDEROFLEXIN-3 (PTHR11153:SF20)	primary active transporter
HUMAN|HGNC=30422|UniProtKB=Q8TF72	SHROOM3	Protein Shroom3	PROTEIN SHROOM3 (PTHR15012:SF33)	actin or actin-binding cytoskeletal protein
HUMAN|HGNC=26119|UniProtKB=Q9BRV8	SIKE1	Suppressor of IKBKE 1	SUPPRESSOR OF IKBKE 1 (PTHR12186:SF4)	-
HUMAN|HGNC=10901|UniProtKB=Q13309	SKP2	S-phase kinase-associated protein 2	S-PHASE KINASE-ASSOCIATED PROTEIN 2 (PTHR16134:SF32)	-	YES	≧2
HUMAN|HGNC=29090|UniProtKB=A6NHR9	SMCHD1	Structural maintenance of chromosomes flexible hinge domain-containing protein 1	STRUCTURAL MAINTENANCE OF CHROMOSOMES FLEXIBLE HINGE DOMAIN-CONTAINING PROTEIN 1 (PTHR22640:SF2)	-	YES	≧2
HUMAN|HGNC=11131|UniProtKB=O00161	SNAP23	Synaptosomal-associated protein 23	SYNAPTOSOMAL-ASSOCIATED PROTEIN 23 (PTHR19305:SF4)	SNARE protein	YES	≧2
HUMAN|HGNC=19392|UniProtKB=Q8WXH5	SOCS4	Suppressor of cytokine signaling 4	SUPPRESSOR OF CYTOKINE SIGNALING 4 (PTHR10155:SF21)	kinase modulator	YES	≧2
HUMAN|HGNC=26212|UniProtKB=P61009	SPCS3	Signal peptidase complex subunit 3	SIGNAL PEPTIDASE COMPLEX SUBUNIT 3 (PTHR12804:SF0)	protease
HUMAN|HGNC=17882|UniProtKB=Q8WXA9	SREK1	Splicing regulatory glutamine/lysine-rich protein 1	SPLICING REGULATORY GLUTAMINE/LYSINE-RICH PROTEIN 1 (PTHR32343:SF8)	RNA splicing factor
HUMAN|HGNC=10780|UniProtKB=Q07955	SRSF1	Serine/arginine-rich splicing factor 1	SERINE/ARGININE-RICH SPLICING FACTOR 1 (PTHR23147:SF44)	RNA splicing factor	YES	≧2
HUMAN|HGNC=11371|UniProtKB=Q9NUL3	STAU2	Double-stranded RNA-binding protein Staufen homolog 2	DOUBLE-STRANDED RNA-BINDING PROTEIN STAUFEN HOMOLOG 2 (PTHR46054:SF1)	-	YES	≧2
HUMAN|HGNC=6510|UniProtKB=P16949	STMN1	Stathmin	STATHMIN (PTHR10104:SF5)	-	YES	≧2
HUMAN|HGNC=3383|UniProtKB=P27105	STOM	Erythrocyte band 7 integral membrane protein	ERYTHROCYTE BAND 7 INTEGRAL MEMBRANE PROTEIN (PTHR10264:SF115)	cytoskeletal protein	YES	1
HUMAN|HGNC=11456|UniProtKB=O00338	SULT1C2	Sulfotransferase 1C2	SULFOTRANSFERASE 1C2 (PTHR11783:SF73)	-	YES	≧2
HUMAN|HGNC=20415|UniProtKB=Q8NBJ7	SUMF2	Inactive C-alpha-formylglycine-generating enzyme 2	INACTIVE C-ALPHA-FORMYLGLYCINE-GENERATING ENZYME 2 (PTHR23150:SF31)	-
HUMAN|HGNC=11580|UniProtKB=Q15814	TBCC	Tubulin-specific chaperone C	TUBULIN-SPECIFIC CHAPERONE C (PTHR15139:SF0)	chaperone
HUMAN|HGNC=14620|UniProtKB=Q9UGI8	TES	Testin	TESTIN (PTHR24211:SF1)	scaffold/adaptor protein	YES	≧2
HUMAN|HGNC=11828|UniProtKB=Q9UDY2	TJP2	Tight junction protein ZO-2	TIGHT JUNCTION PROTEIN ZO-2 (PTHR13865:SF26)	tight junction	YES	≧2
HUMAN|HGNC=16998|UniProtKB=P49755	TMED10	Transmembrane emp24 domain-containing protein 10	TRANSMEMBRANE EMP24 DOMAIN-CONTAINING PROTEIN 10 (PTHR22811:SF183)	vesicle coat protein	YES	1
HUMAN|HGNC=24251|UniProtKB=Q9Y3A6	TMED5	Transmembrane emp24 domain-containing protein 5	TRANSMEMBRANE EMP24 DOMAIN-CONTAINING PROTEIN 5 (PTHR22811:SF41)	vesicle coat protein
HUMAN|HGNC=11877|UniProtKB=P57727	TMPRSS3	Transmembrane protease serine 3	TRANSMEMBRANE PROTEASE SERINE 3 (PTHR24253:SF86)	serine protease	YES	≧2
HUMAN|HGNC=15487|UniProtKB=Q9H3N1	TMX1	Thioredoxin-related transmembrane protein 1	THIOREDOXIN-RELATED TRANSMEMBRANE PROTEIN 1 (PTHR46107:SF2)	-	YES	≧2
HUMAN|HGNC=11895|UniProtKB=Q03169	TNFAIP2	Tumor necrosis factor alpha-induced protein 2	TUMOR NECROSIS FACTOR ALPHA-INDUCED PROTEIN 2 (PTHR21292:SF4)	membrane traffic protein	YES	≧2
HUMAN|HGNC=12005|UniProtKB=P55327	TPD52	Tumor protein D52	TUMOR PROTEIN D52 (PTHR19307:SF12)	-	YES	≧2
HUMAN|HGNC=12436|UniProtKB=O43396	TXNL1	Thioredoxin-like protein 1	THIOREDOXIN-LIKE PROTEIN 1 (PTHR46115:SF1)	-	YES	≧2
HUMAN|HGNC=28082|UniProtKB=Q3KQV9	UAP1L1	UDP-N-acetylhexosamine pyrophosphorylase-like protein 1	UDP-N-ACETYLHEXOSAMINE PYROPHOSPHORYLASE-LIKE PROTEIN 1 (PTHR11952:SF6)	-	YES	1
HUMAN|HGNC=20597|UniProtKB=P61960	UFM1	Ubiquitin-fold modifier 1	UBIQUITIN-FOLD MODIFIER 1 (PTHR15825:SF2)	-	YES	≧2
HUMAN|HGNC=12525|UniProtKB=O60701	UGDH	UDP-glucose 6-dehydrogenase	UDP-GLUCOSE 6-DEHYDROGENASE (PTHR11374:SF35)	-	YES	≧2
HUMAN|HGNC=29594|UniProtKB=O14949	UQCRQ	Cytochrome b-c1 complex subunit 8	CYTOCHROME B-C1 COMPLEX SUBUNIT 8 (PTHR12119:SF2)	oxidoreductase
HUMAN|HGNC=12632|UniProtKB=Q93008	USP9X	Probable ubiquitin carboxyl-terminal hydrolase FAF-X	UBIQUITIN CARBOXYL-TERMINAL HYDROLASE FAF-X-RELATED (PTHR24006:SF777)	cysteine protease	YES	≧2
HUMAN|HGNC=10665|UniProtKB=Q9BVJ6	UTP14A	U3 small nucleolar RNA-associated protein 14 homolog A	U3 SMALL NUCLEOLAR RNA-ASSOCIATED PROTEIN 14 HOMOLOG A (PTHR14150:SF14)	RNA binding protein	YES	≧2
HUMAN|HGNC=25758|UniProtKB=Q8TED0	UTP15	U3 small nucleolar RNA-associated protein 15 homolog	U3 SMALL NUCLEOLAR RNA-ASSOCIATED PROTEIN 15 HOMOLOG (PTHR19924:SF30)	RNA processing factor	YES	1
HUMAN|HGNC=12648|UniProtKB=Q9P0L0	VAPA	Vesicle-associated membrane protein-associated protein A	VESICLE-ASSOCIATED MEMBRANE PROTEIN-ASSOCIATED PROTEIN A (PTHR10809:SF131)	membrane trafficking regulatory protein	YES	≧2
HUMAN|HGNC=23594|UniProtKB=Q709C8	VPS13C	Vacuolar protein sorting-associated protein 13C	VACUOLAR PROTEIN SORTING-ASSOCIATED PROTEIN 13C (PTHR16166:SF125)	-	YES	≧2
HUMAN|HGNC=14340|UniProtKB=Q9UBQ0	VPS29	Vacuolar protein sorting-associated protein 29	VACUOLAR PROTEIN SORTING-ASSOCIATED PROTEIN 29 (PTHR11124:SF12)	vesicle coat protein
HUMAN|HGNC=25651|UniProtKB=Q9C0J8	WDR33	pre-mRNA 3' end processing protein WDR33	PRE-MRNA 3' END PROCESSING PROTEIN WDR33 (PTHR22836:SF0)	RNA processing factor
HUMAN|HGNC=12822|UniProtKB=Q9NQW7	XPNPEP1	Xaa-Pro aminopeptidase 1	XAA-PRO AMINOPEPTIDASE 1 (PTHR43763:SF6)	-
HUMAN|HGNC=23721|UniProtKB=Q7Z2W4	ZC3HAV1	Zinc finger CCCH-type antiviral protein 1	ZINC FINGER CCCH-TYPE ANTIVIRAL PROTEIN 1 (PTHR45740:SF8)	-	YES	≧2
HUMAN|HGNC=22423|UniProtKB=Q96H79	ZC3HAV1L	Zinc finger CCCH-type antiviral protein 1-like	ZINC FINGER CCCH-TYPE ANTIVIRAL PROTEIN 1-LIKE (PTHR47621:SF1)	-

## Sheet: (B) Sense
Supplementary Table S4. Genes Containing a Single Alu Sequence within Their 3'UTRs
(B) Genes Containing Sense Alu Sequence within Their 3'UTRs
Gene ID	Mapped IDs	Gene Name	PANTHER Family/Subfamily	PANTHER Protein Class	Articles related to apoptosis
HUMAN|HGNC=67|UniProtKB=P28288	ABCD3	ATP-binding cassette sub-family D member 3	ATP-BINDING CASSETTE SUB-FAMILY D MEMBER 3 (PTHR11384:SF59)	transporter	YES	≧2
HUMAN|HGNC=253|UniProtKB=P11766	ADH5	Alcohol dehydrogenase class-3	ALCOHOL DEHYDROGENASE CLASS-3 (PTHR43880:SF4)	dehydrogenase	YES	≧2
HUMAN|HGNC=361|UniProtKB=P00568	AK1	Adenylate kinase isoenzyme 1	ADENYLATE KINASE ISOENZYME 1 (PTHR23359:SF59)	nucleotide kinase	YES	≧2
HUMAN|HGNC=363|UniProtKB=P27144	AK4	Adenylate kinase 4, mitochondrial	ADENYLATE KINASE 4, MITOCHONDRIAL (PTHR23359:SF58)	nucleotide kinase	YES	1
HUMAN|HGNC=403|UniProtKB=P51648	ALDH3A2	Fatty aldehyde dehydrogenase	FATTY ALDEHYDE DEHYDROGENASE (PTHR43570:SF9)	-	YES	≧2
HUMAN|HGNC=569|UniProtKB=Q9Y2T2	AP3M1	AP-3 complex subunit mu-1	AP-3 COMPLEX SUBUNIT MU-1 (PTHR10529:SF342)	membrane traffic protein
HUMAN|HGNC=746|UniProtKB=P04424	ASL	Argininosuccinate lyase	ARGININOSUCCINATE LYASE (PTHR43814:SF1)	lyase	YES	≧2
HUMAN|HGNC=799|UniProtKB=P05023	ATP1A1	Sodium/potassium-transporting ATPase subunit alpha-1	SODIUM/POTASSIUM-TRANSPORTING ATPASE SUBUNIT ALPHA-1 (PTHR43294:SF9)	primary active transporter	YES	≧2
HUMAN|HGNC=812|UniProtKB=P16615	ATP2A2	Sarcoplasmic/endoplasmic reticulum calcium ATPase 2	SARCOPLASMIC/ENDOPLASMIC RETICULUM CALCIUM ATPASE 2 (PTHR42861:SF18)	primary active transporter	YES	≧2
HUMAN|HGNC=840|UniProtKB=P24539	ATP5F1	ATP synthase F(0) complex subunit B1, mitochondrial	ATP SYNTHASE F(0) COMPLEX SUBUNIT B1, MITOCHONDRIAL (PTHR12733:SF3)	ATP synthase	YES	≧2
HUMAN|HGNC=21649|UniProtKB=Q9UHR4	BAIAP2L1	Brain-specific angiogenesis inhibitor 1-associated protein 2-like protein 1	BRAIN-SPECIFIC ANGIOGENESIS INHIBITOR 1-ASSOCIATED PROTEIN 2-LIKE PROTEIN 1 (PTHR14206:SF4)	scaffold/adaptor protein	YES	≧2
HUMAN|HGNC=23505|UniProtKB=Q14692	BMS1	Ribosome biogenesis protein BMS1 homolog	RIBOSOME BIOGENESIS PROTEIN BMS1 HOMOLOG (PTHR12858:SF2)	-	YES	≧2
HUMAN|HGNC=1607|UniProtKB=P51684	CCR6	C-C chemokine receptor type 6	C-C CHEMOKINE RECEPTOR TYPE 6 (PTHR10489:SF611)	-	YES	≧2
HUMAN|HGNC=1773|UniProtKB=P11802	CDK4	Cyclin-dependent kinase 4	CYCLIN-DEPENDENT KINASE 4 (PTHR24056:SF129)	non-receptor serine/threonine protein kinase	YES	≧2
HUMAN|HGNC=29076|UniProtKB=Q76N32	CEP68	Centrosomal protein of 68 kDa	CENTROSOMAL PROTEIN OF 68 KDA-RELATED (PTHR14514:SF3)	-
HUMAN|HGNC=24288|UniProtKB=Q8NE62	CHDH	Choline dehydrogenase, mitochondrial	CHOLINE DEHYDROGENASE, MITOCHONDRIAL (PTHR11552:SF147)	dehydrogenase	YES	1
HUMAN|HGNC=2092|UniProtKB=Q00610	CLTC	Clathrin heavy chain 1	CLATHRIN HEAVY CHAIN 1 (PTHR10292:SF7)	vesicle coat protein	YES	≧2
HUMAN|HGNC=26970|UniProtKB=Q5RI15	COX20	Cytochrome c oxidase assembly protein COX20, mitochondrial	CYTOCHROME C OXIDASE ASSEMBLY PROTEIN COX20, MITOCHONDRIAL (PTHR31586:SF2)	-
HUMAN|HGNC=2330|UniProtKB=P23786	CPT2	Carnitine O-palmitoyltransferase 2, mitochondrial	CARNITINE O-PALMITOYLTRANSFERASE 2, MITOCHONDRIAL (PTHR22589:SF51)	acyltransferase	YES	≧2
HUMAN|HGNC=2362|UniProtKB=P46108	CRK	Adapter molecule crk	ADAPTER MOLECULE CRK (PTHR19969:SF8)	-	YES	≧2
HUMAN|HGNC=2514|UniProtKB=P35222	CTNNB1	Catenin beta-1	CATENIN BETA-1 (PTHR45976:SF4)	-	YES	≧2
HUMAN|HGNC=2673|UniProtKB=P51398	DAP3	28S ribosomal protein S29, mitochondrial	28S RIBOSOMAL PROTEIN S29, MITOCHONDRIAL (PTHR12810:SF0)	ribosomal protein	YES	≧2
HUMAN|HGNC=2678|UniProtKB=P14868	DARS	Aspartate--tRNA ligase, cytoplasmic	ASPARTATE--TRNA LIGASE, CYTOPLASMIC (PTHR43450:SF1)	aminoacyl-tRNA synthetase	YES	≧2
HUMAN|HGNC=30915|UniProtKB=P61962	DCAF7	DDB1- and CUL4-associated factor 7	DDB1- AND CUL4-ASSOCIATED FACTOR 7 (PTHR19919:SF0)	-	YES	1
HUMAN|HGNC=2728|UniProtKB=P39656	DDOST	Dolichyl-diphosphooligosaccharide--protein glycosyltransferase 48 kDa subunit	DOLICHYL-DIPHOSPHOOLIGOSACCHARIDE--PROTEIN GLYCOSYLTRANSFERASE 48 KDA SUBUNIT (PTHR10830:SF0)	glycosyltransferase	YES	1
HUMAN|HGNC=13917|UniProtKB=Q13838	DDX39B	Spliceosome RNA helicase DDX39B	SPLICEOSOME RNA HELICASE DDX39B (PTHR47958:SF104)	-
HUMAN|HGNC=18681|UniProtKB=Q7L014	DDX46	Probable ATP-dependent RNA helicase DDX46	ATP-DEPENDENT RNA HELICASE DDX46-RELATED (PTHR24031:SF25)	-	YES	≧2
HUMAN|HGNC=29134|UniProtKB=A2RUS2	DENND3	DENN domain-containing protein 3	DENN DOMAIN-CONTAINING PROTEIN 3 (PTHR12296:SF21)	-
HUMAN|HGNC=28454|UniProtKB=Q9BUN8	DERL1	Derlin-1	DERLIN-1 (PTHR11009:SF1)	primary active transporter	YES	1
HUMAN|HGNC=24637|UniProtKB=Q8IXB1	DNAJC10	DnaJ homolog subfamily C member 10	DNAJ HOMOLOG SUBFAMILY C MEMBER 10 (PTHR44340:SF1)	-	YES	1
HUMAN|HGNC=27030|UniProtKB=Q5F1R6	DNAJC21	DnaJ homolog subfamily C member 21	DNAJ HOMOLOG SUBFAMILY C MEMBER 21 (PTHR44029:SF1)	-
HUMAN|HGNC=2973|UniProtKB=O00429	DNM1L	Dynamin-1-like protein	DYNAMIN-1-LIKE PROTEIN (PTHR11566:SF39)	membrane traffic protein	YES	≧2
HUMAN|HGNC=2974|UniProtKB=P50570	DNM2	Dynamin-2	DYNAMIN-2 (PTHR11566:SF23)	membrane traffic protein	YES	≧2
HUMAN|HGNC=18648|UniProtKB=Q86TI2	DPP9	Dipeptidyl peptidase 9	DIPEPTIDYL PEPTIDASE 9 (PTHR11731:SF109)	serine protease	YES	≧2
HUMAN|HGNC=3049|UniProtKB=Q14126	DSG2	Desmoglein-2	DESMOGLEIN-2 (PTHR24025:SF1)	cadherin	YES	≧2
HUMAN|HGNC=3146|UniProtKB=P42892	ECE1	Endothelin-converting enzyme 1	ENDOTHELIN-CONVERTING ENZYME 1 (PTHR11733:SF130)	metalloprotease	YES	≧2
HUMAN|HGNC=3245|UniProtKB=Q9H223	EHD4	EH domain-containing protein 4	EH DOMAIN-CONTAINING PROTEIN 4 (PTHR11216:SF57)	membrane traffic protein	YES	≧2
HUMAN|HGNC=3247|UniProtKB=Q08426	EHHADH	Peroxisomal bifunctional enzyme	PEROXISOMAL BIFUNCTIONAL ENZYME (PTHR23309:SF9)	dehydrogenase	YES	≧2
HUMAN|HGNC=3272|UniProtKB=Q13347	EIF3I	Eukaryotic translation initiation factor 3 subunit I	EUKARYOTIC TRANSLATION INITIATION FACTOR 3 SUBUNIT I (PTHR19877:SF1)	translation initiation factor	YES	≧2
HUMAN|HGNC=1356|UniProtKB=O94905	ERLIN2	Erlin-2	ERLIN-2 (PTHR15351:SF4)	-	YES	≧2
HUMAN|HGNC=22211|UniProtKB=A0FGR8	ESYT2	Extended synaptotagmin-2	EXTENDED SYNAPTOTAGMIN-2 (PTHR45761:SF2)	-
HUMAN|HGNC=14169|UniProtKB=Q6P587	FAHD1	Acylpyruvase FAHD1, mitochondrial	ACYLPYRUVASE FAHD1, MITOCHONDRIAL (PTHR11820:SF106)	hydrolase
HUMAN|HGNC=19829|UniProtKB=Q8N128	FAM177A1	Protein FAM177A1	PROTEIN FAM177A1 (PTHR31206:SF5)	-
HUMAN|HGNC=3599|UniProtKB=P22087	FBL	rRNA 2'-O-methyltransferase fibrillarin	RRNA 2'-O-METHYLTRANSFERASE FIBRILLARIN (PTHR10335:SF4)	methyltransferase	YES	≧2
HUMAN|HGNC=3720|UniProtKB=Q02790	FKBP4	Peptidyl-prolyl cis-trans isomerase FKBP4	PEPTIDYL-PROLYL CIS-TRANS ISOMERASE FKBP4 (PTHR10516:SF25)	chaperone	YES	≧2
HUMAN|HGNC=4008|UniProtKB=Q9BTY2	FUCA2	Plasma alpha-L-fucosidase	PLASMA ALPHA-L-FUCOSIDASE (PTHR10030:SF40)	glycosidase	YES	1
HUMAN|HGNC=24063|UniProtKB=Q96C23	GALM	Aldose 1-epimerase	ALDOSE 1-EPIMERASE (PTHR10091:SF0)	epimerase/racemase
HUMAN|HGNC=21531|UniProtKB=Q8N3T1	GALNT15	Polypeptide N-acetylgalactosaminyltransferase 15	POLYPEPTIDE N-ACETYLGALACTOSAMINYLTRANSFERASE 15 (PTHR11675:SF36)	glycosyltransferase
HUMAN|HGNC=23375|UniProtKB=Q14C86	GAPVD1	GTPase-activating protein and VPS9 domain-containing protein 1	GTPASE-ACTIVATING PROTEIN AND VPS9 DOMAIN-CONTAINING PROTEIN 1 (PTHR23101:SF111)	guanyl-nucleotide exchange factor
HUMAN|HGNC=4425|UniProtKB=Q08379	GOLGA2	Golgin subfamily A member 2	GOLGIN SUBFAMILY A MEMBER 2-RELATED (PTHR10881:SF58)	membrane traffic protein	YES	≧2
HUMAN|HGNC=4566|UniProtKB=P62993	GRB2	Growth factor receptor-bound protein 2	GROWTH FACTOR RECEPTOR-BOUND PROTEIN 2 (PTHR46037:SF4)	-	YES	≧2
HUMAN|HGNC=4652|UniProtKB=P35269	GTF2F1	General transcription factor IIF subunit 1	GENERAL TRANSCRIPTION FACTOR IIF SUBUNIT 1 (PTHR13011:SF0)	general transcription factor
HUMAN|HGNC=4801|UniProtKB=P40939	HADHA	Trifunctional enzyme subunit alpha, mitochondrial	TRIFUNCTIONAL ENZYME SUBUNIT ALPHA, MITOCHONDRIAL (PTHR43612:SF7)	dehydrogenase	YES	≧2
HUMAN|HGNC=4834|UniProtKB=Q9Y450	HBS1L	HBS1-like protein	HBS1-LIKE PROTEIN (PTHR23115:SF188)	translation factor	YES	1
HUMAN|HGNC=14122|UniProtKB=Q96RY5	HN1L	Protein cramped-like	PROTEIN CRAMPED-LIKE (PTHR21677:SF1)	DNA binding protein	YES	1
HUMAN|HGNC=24941|UniProtKB=P51991	HNRNPA3	Heterogeneous nuclear ribonucleoprotein A3	HETEROGENEOUS NUCLEAR RIBONUCLEOPROTEIN A3 (PTHR48026:SF12)	-
HUMAN|HGNC=5048|UniProtKB=Q00839	HNRNPU	Heterogeneous nuclear ribonucleoprotein U	HETEROGENEOUS NUCLEAR RIBONUCLEOPROTEIN U (PTHR12381:SF11)	-	YES	≧2
HUMAN|HGNC=18572|UniProtKB=Q6YN16	HSDL2	Hydroxysteroid dehydrogenase-like protein 2	HYDROXYSTEROID DEHYDROGENASE-LIKE PROTEIN 2 (PTHR42808:SF3)	-	YES	≧2
HUMAN|HGNC=32538|UniProtKB=Q58FF6	HSP90AB4P	Putative heat shock protein HSP 90-beta 4	HEAT SHOCK PROTEIN HSP 90-BETA-RELATED (PTHR11528:SF79)	Hsp90 family chaperone
HUMAN|HGNC=26430|UniProtKB=Q70UQ0	IKBIP	Inhibitor of nuclear factor kappa-B kinase-interacting protein	INHIBITOR OF NUCLEAR FACTOR KAPPA-B KINASE-INTERACTING PROTEIN (PTHR21734:SF10)	-	YES	1
HUMAN|HGNC=5986|UniProtKB=Q14116	IL18	Interleukin-18	-	-	YES	≧2
HUMAN|HGNC=4021|UniProtKB=Q06136	KDSR	3-ketodihydrosphingosine reductase	3-KETODIHYDROSPHINGOSINE REDUCTASE (PTHR43550:SF3)	-	YES	1
HUMAN|HGNC=6388|UniProtKB=P52732	KIF11	Kinesin-like protein KIF11	KINESIN-LIKE PROTEIN KIF11 (PTHR47970:SF12)	-	YES	≧2
HUMAN|HGNC=6394|UniProtKB=P52294	KPNA1	Importin subunit alpha-5	IMPORTIN SUBUNIT ALPHA-5 (PTHR23316:SF3)	transporter	YES	≧2
HUMAN|HGNC=6484|UniProtKB=Q16363	LAMA4	Laminin subunit alpha-4	LAMININ SUBUNIT ALPHA-4 (PTHR15036:SF47)	-	YES	≧2
HUMAN|HGNC=6501|UniProtKB=P13473	LAMP2	Lysosome-associated membrane glycoprotein 2	LYSOSOME-ASSOCIATED MEMBRANE GLYCOPROTEIN 2 (PTHR11506:SF6)	membrane trafficking regulatory protein	YES	≧2
HUMAN|HGNC=6512|UniProtKB=Q9P2J5	LARS	Leucine--tRNA ligase, cytoplasmic	LEUCINE--TRNA LIGASE, CYTOPLASMIC (PTHR45794:SF1)	-	YES	≧2
HUMAN|HGNC=28229|UniProtKB=Q9BRT6	LLPH	Protein LLP homolog	PROTEIN LLP HOMOLOG (PTHR34253:SF3)	-
HUMAN|HGNC=14553|UniProtKB=Q7Z4F1	LRP10	Low-density lipoprotein receptor-related protein 10	LOW-DENSITY LIPOPROTEIN RECEPTOR-RELATED PROTEIN 10 (PTHR24270:SF17)	apolipoprotein	YES	≧2
HUMAN|HGNC=25652|UniProtKB=Q9H089	LSG1	Large subunit GTPase 1 homolog	LARGE SUBUNIT GTPASE 1 HOMOLOG (PTHR45709:SF2)	-
HUMAN|HGNC=6934|UniProtKB=P43121	MCAM	Cell surface glycoprotein MUC18	CELL SURFACE GLYCOPROTEIN MUC18 (PTHR11973:SF18)	immunoglobulin superfamily cell adhesion molecule	YES	≧2
HUMAN|HGNC=25782|UniProtKB=Q9BTE3	MCMBP	Mini-chromosome maintenance complex-binding protein	MINI-CHROMOSOME MAINTENANCE COMPLEX-BINDING PROTEIN (PTHR13489:SF0)	-
HUMAN|HGNC=7064|UniProtKB=O14880	MGST3	Microsomal glutathione S-transferase 3	MICROSOMAL GLUTATHIONE S-TRANSFERASE 3 (PTHR10250:SF22)	transferase	YES	≧2
HUMAN|HGNC=14276|UniProtKB=Q9BYD3	MRPL4	39S ribosomal protein L4, mitochondrial	39S RIBOSOMAL PROTEIN L4, MITOCHONDRIAL (PTHR10746:SF6)	-
HUMAN|HGNC=14516|UniProtKB=Q9Y676	MRPS18B	28S ribosomal protein S18b, mitochondrial	28S RIBOSOMAL PROTEIN S18B, MITOCHONDRIAL (PTHR13329:SF2)	ribosomal protein	YES	1
HUMAN|HGNC=7597|UniProtKB=O00159	MYO1C	Unconventional myosin-Ic	UNCONVENTIONAL MYOSIN-IC (PTHR13140:SF255)	actin binding motor protein
HUMAN|HGNC=29916|UniProtKB=Q9UHQ1	NARF	Nuclear prelamin A recognition factor	NUCLEAR PRELAMIN A RECOGNITION FACTOR (PTHR11615:SF124)	dehydrogenase
HUMAN|HGNC=24305|UniProtKB=Q15021	NCAPD2	Condensin complex subunit 1	CONDENSIN COMPLEX SUBUNIT 1 (PTHR14222:SF2)	chromatin/chromatin-binding, or -regulatory protein	YES	≧2
HUMAN|HGNC=1112|UniProtKB=Q15003	NCAPH	Condensin complex subunit 2	CONDENSIN COMPLEX SUBUNIT 2 (PTHR13108:SF9)	-	YES	≧2
HUMAN|HGNC=7658|UniProtKB=Q09161	NCBP1	Nuclear cap-binding protein subunit 1	NUCLEAR CAP-BINDING PROTEIN SUBUNIT 1 (PTHR12412:SF2)	RNA splicing factor	YES	1
HUMAN|HGNC=7688|UniProtKB=Q16718	NDUFA5	NADH dehydrogenase [ubiquinone] 1 alpha subcomplex subunit 5	NADH DEHYDROGENASE [UBIQUINONE] 1 ALPHA SUBCOMPLEX SUBUNIT 5 (PTHR12653:SF0)	oxidoreductase	YES	≧2
HUMAN|HGNC=28816|UniProtKB=Q7L592	NDUFAF7	Protein arginine methyltransferase NDUFAF7, mitochondrial	PROTEIN ARGININE METHYLTRANSFERASE NDUFAF7, MITOCHONDRIAL (PTHR12049:SF7)	-
HUMAN|HGNC=24328|UniProtKB=Q9Y221	NIP7	60S ribosome subunit biogenesis protein NIP7 homolog	60S RIBOSOME SUBUNIT BIOGENESIS PROTEIN NIP7 HOMOLOG (PTHR23415:SF34)	scaffold/adaptor protein
HUMAN|HGNC=19910|UniProtKB=Q9H6R4	NOL6	Nucleolar protein 6	NUCLEOLAR PROTEIN 6 (PTHR17972:SF0)	RNA binding protein	YES	1
HUMAN|HGNC=8004|UniProtKB=O14786	NRP1	Neuropilin-1	NEUROPILIN-1 (PTHR46806:SF4)	-	YES	≧2
HUMAN|HGNC=8022|UniProtKB=P49902	NT5C2	Cytosolic purine 5'-nucleotidase	CYTOSOLIC PURINE 5'-NUCLEOTIDASE (PTHR12103:SF17)	nucleotide phosphatase	YES	1
HUMAN|HGNC=8045|UniProtKB=Q9Y266	NUDC	Nuclear migration protein nudC	NUCLEAR MIGRATION PROTEIN NUDC (PTHR12356:SF3)	microtubule or microtubule-binding cytoskeletal protein	YES	1
HUMAN|HGNC=17859|UniProtKB=Q5SRE5	NUP188	Nucleoporin NUP188 homolog	NUCLEOPORIN NUP188 HOMOLOG (PTHR31431:SF1)	-	YES	≧2
HUMAN|HGNC=8066|UniProtKB=P37198	NUP62	Nuclear pore glycoprotein p62	NUCLEAR PORE GLYCOPROTEIN P62 (PTHR12084:SF12)	transporter	YES	≧2
HUMAN|HGNC=16074|UniProtKB=Q9NX40	OCIAD1	OCIA domain-containing protein 1	OCIA DOMAIN-CONTAINING PROTEIN 1 (PTHR13336:SF4)	membrane traffic protein	YES	1
HUMAN|HGNC=8124|UniProtKB=Q02218	OGDH	2-oxoglutarate dehydrogenase, mitochondrial	2-OXOGLUTARATE DEHYDROGENASE, MITOCHONDRIAL (PTHR23152:SF7)	-	YES	≧2
HUMAN|HGNC=25585|UniProtKB=Q8N543	OGFOD1	Prolyl 3-hydroxylase OGFOD1	PROLYL 3-HYDROXYLASE OGFOD1 (PTHR12117:SF0)	histone modifying enzyme	YES	≧2
HUMAN|HGNC=28833|UniProtKB=Q9NTK5	OLA1	Obg-like ATPase 1	OBG-LIKE ATPASE 1 (PTHR23305:SF11)	G-protein	YES	≧2
HUMAN|HGNC=20074|UniProtKB=Q504Q3	PAN2	PAN2-PAN3 deadenylation complex catalytic subunit PAN2	PAN2-PAN3 DEADENYLATION COMPLEX CATALYTIC SUBUNIT PAN2 (PTHR15728:SF0)	exoribonuclease	YES	≧2
HUMAN|HGNC=8727|UniProtKB=Q15154	PCM1	Pericentriolar material 1 protein	PERICENTRIOLAR MATERIAL 1 PROTEIN (PTHR14164:SF12)	-	YES	≧2
HUMAN|HGNC=8763|UniProtKB=Q53EL6	PDCD4	Programmed cell death protein 4	PROGRAMMED CELL DEATH PROTEIN 4 (PTHR12626:SF3)	translation factor	YES	≧2
HUMAN|HGNC=28995|UniProtKB=Q6P996	PDXDC1	Pyridoxal-dependent decarboxylase domain-containing protein 1	PYRIDOXAL-DEPENDENT DECARBOXYLASE DOMAIN-CONTAINING PROTEIN 1-RELATED (PTHR42735:SF10)	-
HUMAN|HGNC=8927|UniProtKB=Q93100	PHKB	Phosphorylase b kinase regulatory subunit beta	PHOSPHORYLASE B KINASE REGULATORY SUBUNIT BETA (PTHR10749:SF8)	kinase activator	YES	1
HUMAN|HGNC=9009|UniProtKB=Q13563	PKD2	Polycystin-2	POLYCYSTIN-2 (PTHR10877:SF114)	ion channel	YES	≧2
HUMAN|HGNC=17158|UniProtKB=Q8IV08	PLD3	Phospholipase D3	PHOSPHOLIPASE D3 (PTHR10185:SF16)	-	YES	1
HUMAN|HGNC=16893|UniProtKB=O60664	PLIN3	Perilipin-3	PERILIPIN-3 (PTHR14024:SF11)	scaffold/adaptor protein	YES	≧2
HUMAN|HGNC=14106|UniProtKB=Q9HCU8	POLD4	DNA polymerase delta subunit 4	DNA POLYMERASE DELTA SUBUNIT 4 (PTHR14303:SF0)	DNA-directed DNA polymerase	YES	1
HUMAN|HGNC=17631|UniProtKB=Q9GZS1	POLR1E	DNA-directed RNA polymerase I subunit RPA49	DNA-DIRECTED RNA POLYMERASE I SUBUNIT RPA49 (PTHR14440:SF7)	-	YES	1
HUMAN|HGNC=28883|UniProtKB=Q9H2U2	PPA2	Inorganic pyrophosphatase 2, mitochondrial	INORGANIC PYROPHOSPHATASE 2, MITOCHONDRIAL (PTHR10286:SF49)	pyrophosphatase	YES	1
HUMAN|HGNC=9255|UniProtKB=P23284	PPIB	Peptidyl-prolyl cis-trans isomerase B	PEPTIDYL-PROLYL CIS-TRANS ISOMERASE B (PTHR11071:SF477)	-	YES	≧2
HUMAN|HGNC=9258|UniProtKB=Q9UNP9	PPIE	Peptidyl-prolyl cis-trans isomerase E	PEPTIDYL-PROLYL CIS-TRANS ISOMERASE D-RELATED (PTHR11071:SF380)	-
HUMAN|HGNC=9393|UniProtKB=P17252	PRKCA	Protein kinase C alpha type	PROTEIN KINASE C ALPHA TYPE (PTHR24356:SF193)	non-receptor serine/threonine protein kinase	YES	≧2
HUMAN|HGNC=9404|UniProtKB=P41743	PRKCI	Protein kinase C iota type	PROTEIN KINASE C IOTA TYPE (PTHR24356:SF214)	non-receptor serine/threonine protein kinase	YES	≧2
HUMAN|HGNC=17349|UniProtKB=O43172	PRPF4	U4/U6 small nuclear ribonucleoprotein Prp4	U4/U6 SMALL NUCLEAR RIBONUCLEOPROTEIN PRP4 (PTHR19846:SF0)	RNA splicing factor	YES	≧2
HUMAN|HGNC=9563|UniProtKB=Q16401	PSMD5	26S proteasome non-ATPase regulatory subunit 5	26S PROTEASOME NON-ATPASE REGULATORY SUBUNIT 5 (PTHR13554:SF10)	-
HUMAN|HGNC=9670|UniProtKB=P10586	PTPRF	Receptor-type tyrosine-protein phosphatase F	RECEPTOR-TYPE TYROSINE-PROTEIN PHOSPHATASE F (PTHR19134:SF203)	protein phosphatase	YES	≧2
HUMAN|HGNC=9673|UniProtKB=Q12913	PTPRJ	Receptor-type tyrosine-protein phosphatase eta	RECEPTOR-TYPE TYROSINE-PROTEIN PHOSPHATASE ETA (PTHR19134:SF211)	protein phosphatase	YES	≧2
HUMAN|HGNC=9725|UniProtKB=P06737	PYGL	Glycogen phosphorylase, liver form	GLYCOGEN PHOSPHORYLASE, LIVER FORM (PTHR11468:SF26)	glycosyltransferase
HUMAN|HGNC=17168|UniProtKB=Q9H2M9	RAB3GAP2	Rab3 GTPase-activating protein non-catalytic subunit	RAB3 GTPASE-ACTIVATING PROTEIN NON-CATALYTIC SUBUNIT (PTHR12472:SF0)	G-protein modulator
HUMAN|HGNC=9797|UniProtKB=P47224	RABIF	Guanine nucleotide exchange factor MSS4	GUANINE NUCLEOTIDE EXCHANGE FACTOR MSS4 (PTHR13276:SF0)	guanyl-nucleotide exchange factor	YES	1
HUMAN|HGNC=13232|UniProtKB=Q8NHQ8	RASSF8	Ras association domain-containing protein 8	RAS ASSOCIATION DOMAIN-CONTAINING PROTEIN 8 (PTHR15286:SF9)	scaffold/adaptor protein	YES	≧2
HUMAN|HGNC=9890|UniProtKB=Q16576	RBBP7	Histone-binding protein RBBP7	HISTONE-BINDING PROTEIN RBBP7 (PTHR22850:SF82)	-	YES	≧2
HUMAN|HGNC=30457|UniProtKB=A6NED2	RCCD1	RCC1 domain-containing protein 1	RCC1 DOMAIN-CONTAINING PROTEIN 1 (PTHR46849:SF1)	-
HUMAN|HGNC=17964|UniProtKB=Q8TC12	RDH11	Retinol dehydrogenase 11	RETINOL DEHYDROGENASE 11 (PTHR24320:SF108)	dehydrogenase	YES	≧2
HUMAN|HGNC=9970|UniProtKB=P35250	RFC2	Replication factor C subunit 2	REPLICATION FACTOR C SUBUNIT 2 (PTHR11669:SF5)	DNA-directed DNA polymerase	YES	≧2
HUMAN|HGNC=10050|UniProtKB=Q05823	RNASEL	2-5A-dependent ribonuclease	2-5A-DEPENDENT RIBONUCLEASE (PTHR24141:SF1)	-	YES	≧2
HUMAN|HGNC=10362|UniProtKB=Q02878	RPL6	60S ribosomal protein L6	60S RIBOSOMAL PROTEIN L6 (PTHR10715:SF7)	ribosomal protein	YES	≧2
HUMAN|HGNC=10410|UniProtKB=P62266	RPS23	40S ribosomal protein S23	40S RIBOSOMAL PROTEIN S23 (PTHR11652:SF44)	ribosomal protein	YES	≧2
HUMAN|HGNC=10432|UniProtKB=P51812	RPS6KA3	Ribosomal protein S6 kinase alpha-3	RIBOSOMAL PROTEIN S6 KINASE ALPHA-3 (PTHR24351:SF58)	-	YES	≧2
HUMAN|HGNC=10464|UniProtKB=Q15404	RSU1	Ras suppressor protein 1	LEUCINE-RICH REPEAT PROTEIN 1-RELATED (PTHR45752:SF59)	scaffold/adaptor protein	YES	≧2
HUMAN|HGNC=28996|UniProtKB=Q92541	RTF1	RNA polymerase-associated protein RTF1 homolog	RNA POLYMERASE-ASSOCIATED PROTEIN RTF1 HOMOLOG (PTHR13115:SF8)	-	YES	1
HUMAN|HGNC=10538|UniProtKB=O43290	SART1	U4/U6.U5 tri-snRNP-associated protein 1	U4/U6.U5 TRI-SNRNP-ASSOCIATED PROTEIN 1 (PTHR14152:SF5)	extracellular matrix protein	YES	≧2
HUMAN|HGNC=10563|UniProtKB=O15126	SCAMP1	Secretory carrier-associated membrane protein 1	SECRETORY CARRIER-ASSOCIATED MEMBRANE PROTEIN 1 (PTHR10687:SF8)	transfer/carrier protein	YES	≧2
HUMAN|HGNC=21695|UniProtKB=Q9Y6U3	SCIN	Adseverin	ADSEVERIN (PTHR11977:SF78)	non-motor actin binding protein	YES	≧2
HUMAN|HGNC=17018|UniProtKB=Q9Y6Y8	SEC23IP	SEC23-interacting protein	SEC23-INTERACTING PROTEIN (PTHR23509:SF4)	phospholipase
HUMAN|HGNC=10767|UniProtKB=Q12874	SF3A3	Splicing factor 3A subunit 3	SPLICING FACTOR 3A SUBUNIT 3 (PTHR12786:SF3)	RNA splicing factor	YES	1
HUMAN|HGNC=10769|UniProtKB=Q13435	SF3B2	Splicing factor 3B subunit 2	SPLICING FACTOR 3B SUBUNIT 2 (PTHR12785:SF6)	RNA splicing factor
HUMAN|HGNC=10833|UniProtKB=Q9Y371	SH3GLB1	Endophilin-B1	ENDOPHILIN-B1 (PTHR14167:SF52)	-	YES	≧2
HUMAN|HGNC=29547|UniProtKB=Q8NEM2	SHCBP1	SHC SH2 domain-binding protein 1	SHC SH2 DOMAIN-BINDING PROTEIN 1 (PTHR14695:SF8)	-	YES	≧2
HUMAN|HGNC=10990|UniProtKB=P12235	SLC25A4	ADP/ATP translocase 1	ADP/ATP TRANSLOCASE 1 (PTHR45635:SF32)	-	YES
HUMAN|HGNC=33920|UniProtKB=Q6IEE8	SLFN5	Schlafen family member 12-like	SCHLAFEN FAMILY MEMBER 12-LIKE (PTHR12155:SF2)	-
HUMAN|HGNC=29846|UniProtKB=O14512	SOCS7	Suppressor of cytokine signaling 7	SUPPRESSOR OF CYTOKINE SIGNALING 7 (PTHR10155:SF5)	kinase modulator	YES	≧2
HUMAN|HGNC=16713|UniProtKB=O75494	SRSF10	Serine/arginine-rich splicing factor 10	SERINE/ARGININE-RICH SPLICING FACTOR 10 (PTHR23147:SF5)	RNA splicing factor	YES	≧2
HUMAN|HGNC=10785|UniProtKB=P84103	SRSF3	Serine/arginine-rich splicing factor 3	SERINE/ARGININE-RICH SPLICING FACTOR 3 (PTHR23147:SF121)	RNA splicing factor	YES	≧2
HUMAN|HGNC=11364|UniProtKB=P40763	STAT3	Signal transducer and activator of transcription 3	SIGNAL TRANSDUCER AND ACTIVATOR OF TRANSCRIPTION 3 (PTHR11801:SF2)	DNA-binding transcription factor	YES	≧2
HUMAN|HGNC=11430|UniProtKB=Q86Y82	STX12	Syntaxin-12	SYNTAXIN-12 (PTHR19957:SF88)	SNARE protein
HUMAN|HGNC=11491|UniProtKB=P43405	SYK	Tyrosine-protein kinase SYK	TYROSINE-PROTEIN KINASE SYK (PTHR24418:SF231)	-	YES	≧2
HUMAN|HGNC=30740|UniProtKB=Q9BW92	TARS2	Threonine--tRNA ligase, mitochondrial	THREONINE--TRNA LIGASE, MITOCHONDRIAL (PTHR11451:SF27)	aminoacyl-tRNA synthetase
HUMAN|HGNC=11579|UniProtKB=O75347	TBCA	Tubulin-specific chaperone A	TUBULIN-SPECIFIC CHAPERONE A (PTHR21500:SF3)	chaperonin	YES	≧2
HUMAN|HGNC=24493|UniProtKB=Q9BV44	THUMPD3	THUMP domain-containing protein 3	THUMP DOMAIN-CONTAINING PROTEIN 3 (PTHR14911:SF13)	RNA methyltransferase
HUMAN|HGNC=11845|UniProtKB=Q9Y490	TLN1	Talin-1	TALIN-1 (PTHR19981:SF7)	-	YES	≧2
HUMAN|HGNC=11870|UniProtKB=P82094	TMF1	TATA element modulatory factor	TATA ELEMENT MODULATORY FACTOR (PTHR46515:SF1)	-	YES	1
HUMAN|HGNC=11873|UniProtKB=Q9NYL9	TMOD3	Tropomodulin-3	TROPOMODULIN-3 (PTHR10901:SF18)	actin or actin-binding cytoskeletal protein	YES	≧2
HUMAN|HGNC=5318|UniProtKB=P24821	TNC	Tenascin	TENASCIN (PTHR46708:SF1)	extracellular matrix protein	YES	≧2
HUMAN|HGNC=29456|UniProtKB=Q5JTV8	TOR1AIP1	Torsin-1A-interacting protein 1	TORSIN-1A-INTERACTING PROTEIN 1 (PTHR18843:SF6)	-
HUMAN|HGNC=12013|UniProtKB=P67936	TPM4	Tropomyosin alpha-4 chain	TROPOMYOSIN ALPHA-4 CHAIN (PTHR19269:SF40)	actin binding motor protein	YES	≧2
HUMAN|HGNC=17009|UniProtKB=Q9H2D6	TRIOBP	TRIO and F-actin-binding protein	TRIO AND F-ACTIN-BINDING PROTEIN (PTHR17271:SF10)	actin or actin-binding cytoskeletal protein
HUMAN|HGNC=15506|UniProtKB=Q9BSV6	TSEN34	tRNA-splicing endonuclease subunit Sen34	TRNA-SPLICING ENDONUCLEASE SUBUNIT SEN34 (PTHR13070:SF0)	endoribonuclease
HUMAN|HGNC=12379|UniProtKB=Q15631	TSN	Translin	TRANSLIN (PTHR10741:SF2)	-	YES	≧2
HUMAN|HGNC=12380|UniProtKB=Q99598	TSNAX	Translin-associated protein X	TRANSLIN-ASSOCIATED PROTEIN X (PTHR10741:SF5)	-
HUMAN|HGNC=15947|UniProtKB=Q9BZF9	UACA	Uveal autoantigen with coiled-coil domains and ankyrin repeats	UVEAL AUTOANTIGEN WITH COILED-COIL DOMAINS AND ANKYRIN REPEATS (PTHR24173:SF23)	-	YES	≧2
HUMAN|HGNC=12582|UniProtKB=P14927	UQCRB	Cytochrome b-c1 complex subunit 7	CYTOCHROME B-C1 COMPLEX SUBUNIT 7 (PTHR12022:SF2)	reductase
HUMAN|HGNC=12586|UniProtKB=P22695	UQCRC2	Cytochrome b-c1 complex subunit 2, mitochondrial	CYTOCHROME B-C1 COMPLEX SUBUNIT 2, MITOCHONDRIAL (PTHR11851:SF216)	metalloprotease	YES	≧2
HUMAN|HGNC=12612|UniProtKB=P54578	USP14	Ubiquitin carboxyl-terminal hydrolase 14	UBIQUITIN CARBOXYL-TERMINAL HYDROLASE 14 (PTHR43982:SF1)	cysteine protease	YES	≧2
HUMAN|HGNC=30696|UniProtKB=Q8NI36	WDR36	WD repeat-containing protein 36	WD REPEAT-CONTAINING PROTEIN 36 (PTHR22840:SF12)	-	YES	≧2
HUMAN|HGNC=28826|UniProtKB=Q6UXN9	WDR82	WD repeat-containing protein 82	WD REPEAT-CONTAINING PROTEIN 82 (PTHR19861:SF0)	methyltransferase
HUMAN|HGNC=24997|UniProtKB=A4D1P6	WDR91	WD repeat-containing protein 91	WD REPEAT-CONTAINING PROTEIN 91 (PTHR13083:SF3)	-
HUMAN|HGNC=12805|UniProtKB=P47989	XDH	Xanthine dehydrogenase/oxidase	XANTHINE DEHYDROGENASE/OXIDASE (PTHR11908:SF80)	oxidoreductase	YES	≧2
HUMAN|HGNC=12849|UniProtKB=P31946	YWHAB	14-3-3 protein beta/alpha	14-3-3 PROTEIN BETA/ALPHA (PTHR18860:SF28)	scaffold/adaptor protein	YES	≧2
HUMAN|HGNC=16176|UniProtKB=Q9H171	ZBP1	Z-DNA-binding protein 1	Z-DNA-BINDING PROTEIN 1 (PTHR14966:SF0)	-	YES	≧2
